# Supplementary material for: Investigating Helium Bubble Nucleation and Growth through Simultaneous In-Situ Cryogenic, Ion Implantation, and Environmental Transmission Electron Microscopy
Source: MDPI journal article supplement (doi:10.3390/ma12162618), 2019-08-16
Supplement: s1 [file s1]

Supplementary

# Investigating Helium Bubble Nucleation and Growth through Simultaneous In-situ Cryogenic, Ion Implantation, and Environmental Transmission Electron Microscopy

Caitlin A. Taylor <sup>1</sup>, Samuel Briggs <sup>1,2</sup>, Graeme Greaves <sup>3</sup>, Anthony Monterrosa <sup>1</sup>, Emily Aradi <sup>3</sup>, Joshua D. Sugar <sup>4</sup>, David B. Robinson <sup>4</sup>, Khalid Hattar <sup>1,\*</sup> and Jonathan A. Hinks <sup>3</sup>

<sup>1</sup> Sandia National Laboratories, Albuquerque 87185, NM, USA

<sup>2</sup> Nuclear Science and Engineering, Oregon State University, Corvallis 97331, OR, USA

<sup>3</sup> School of Computing and Engineering, University of Huddersfield, Huddersfield HD1 3DH, UK

<sup>4</sup> Sandia National Laboratories, Livermore 94551, CA, USA

\* Correspondence: khattar@sandia.gov

Received: 2 July 2019; Accepted: 13 August 2019; Published: date

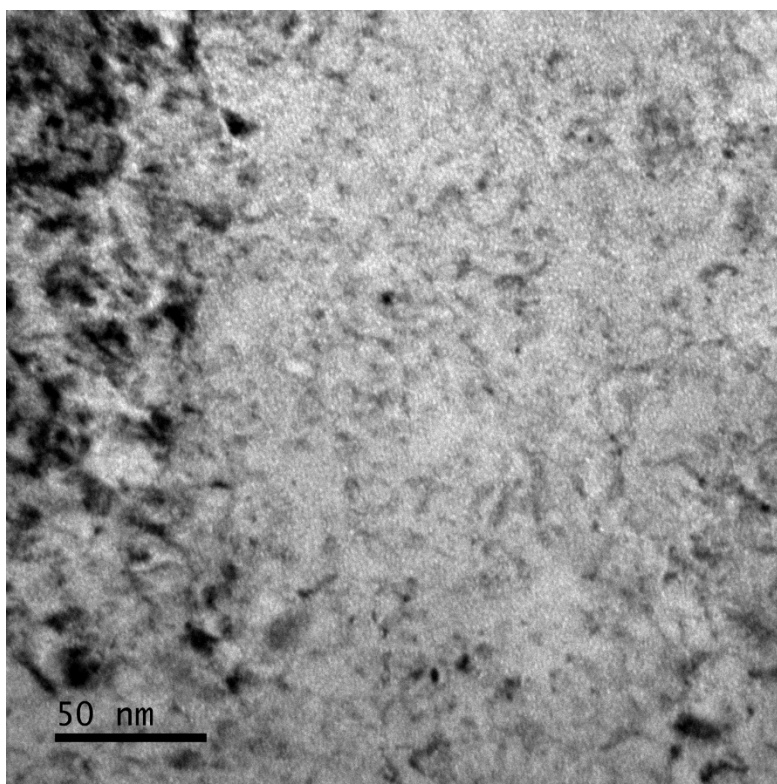

**Figure S1.** Under-focus image showing He bubbles during implantation.

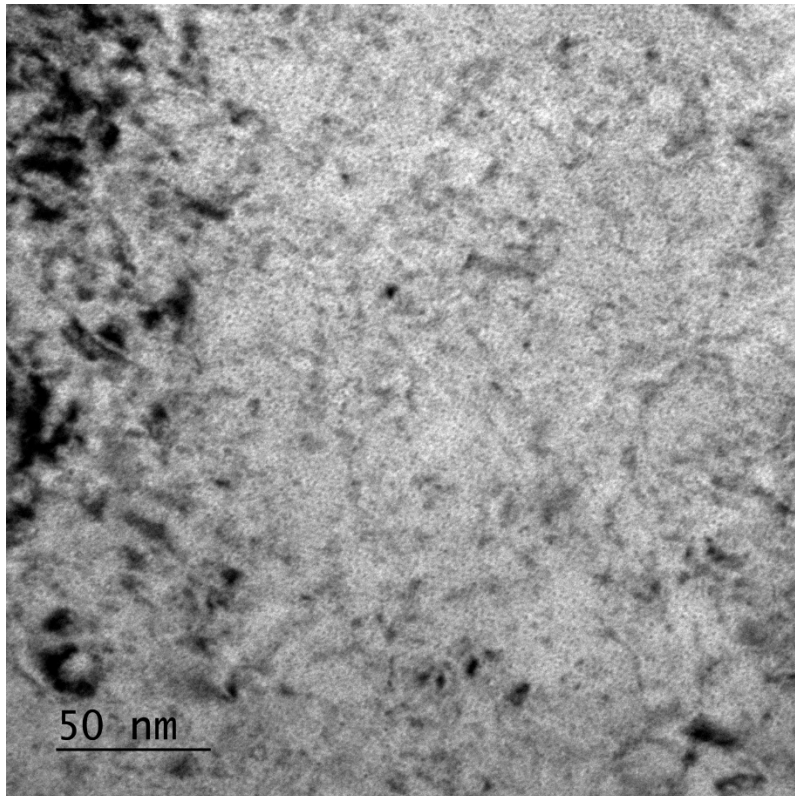

**Figure S2.** Over-focus image showing He bubbles during implantation.

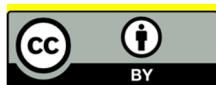

© 2019 by the authors. Submitted for possible open access publication under the terms and conditions of the Creative Commons Attribution (CC BY) license (<http://creativecommons.org/licenses/by/4.0/>).
